# Supplementary material
Source: PubMed Central journal article supplement (PMC3346432)
Supplement: supp_11.5.662_SuppMaterial.pdf [file supp_11.5.662_SuppMaterial.pdf]

**Figure S1.** N-terminal 450 characters of a multiple sequence alignment of a data set of eukaryotic RPA2 proteins. A multiple sequence alignment was generated from a data set of 16 eukaryotic RPA2 proteins. The trypanosomatid sequences contain more than 200 amino acids more in their N-termini than other RPA2 sequences. Residues are displayed with a blue or cyan background colour to indicate either identity or similarity to the majority consensus. Yellow flags on the *T. brucei* sequence indicate the amino acids tagged in this study. Blue bars mark stretches rich in basic amino acids in the trypanosome proteins. The red bar marks a region of limited similarity, the green bar marks RPA2 domain A. Species abbreviations: AraTh: *Arabidopsis thaliana*, PhyPa: *Physcomitrella patens*, CaeEl: *Caenorhabditis elegans*, DicDi: *Dictyostelium discoideum*, HomSa: *Homo sapiens*, SacCe: *Saccharomyces cerevisiae*, SchPo: *Schizosaccharomyces pombe*, PhaTr: *Phaeodactylum tricornutum*, PhySo: *Phytophthora sojae*, ParTe: *Paramecium tetraurelia*, TetTh: *Tetrahymena thermophila*, DroMe: *Drosophila melanogaster*, EntHi: *Entamoeba histolytica*, TriVa: *Trichomonas vaginalis*, CryPa: *Cryptosporidium parvum*, ToxGo: *Toxoplasma gondii*, TheAn: *Theileria annulata*, CyaMe: *Cyanidioschyzon merolae*, GiaLa: *Giardia lamblia*, PlaFa: *Plasmodium falciparum*, LeiMa: *Leishmania major*, TryBr: *Trypanosoma brucei*.

**Figure S2.** Multiple sequence alignment of trypanosomatid RPA2 N-termini. RPA2 N-termini from available trypanosome genomes. Note that most of the basic residues in the basic stretches in the *T. brucei* sequence are not conserved. Residues were given a blue or cyan background colour to indicate either identity or similarity to the majority consensus. Blue bars mark stretches rich in basic amino acids in *T. brucei*. The green bar marks RPA2 domain A.

**Figure S3.** Genomic PCR products confirming the correct integration of the tagging constructs in bloodstream-form (A) and procyclic (B) cells. Expected PCR product size for control PCR (primers c) was 428 bp, for PCR from *YFP* to *RPA2* (y) was 956 bp for RPA2, 610 bp for RPA2 $\Delta_{1-113}$  and 443 bp for RPA2 $\Delta_{1-172}$ . DNA ladders are NEB 100 bp and 1 kb ladders.

**Figure S4.** Cellular localization of N-terminal RPA2 truncations in procyclic cells. While TY-YFP-RPA2 localizes to the nucleus, TY-YFP-rpa2 $\Delta_{1-113}$  and -rpa2 $\Delta_{1-172}$  are excluded. NLS-TY-YFP-RPA2 has a different sub-nuclear localization to NLS-TY-YFP-rpa2 $\Delta_{1-172}$ . YFP fluorescence is pseudo-coloured in green, DAPI in blue. Bars: 1  $\mu$ m.

**Figure S5.** Cellular localisation of NLS-TY-YFP-RPA2 and NLS-TY-YFP-rpa2 $\Delta_{1-172}$  in bloodstream-form cells. A strong, punctate extra-nucleolar YFP signal was observed (arrowheads) in many cells indicating that NLS-TY-YFP-RPA2 is found in the ESB, as for TY-YFP-RPA2. This region also corresponds to a region of low DAPI stain intensity. YFP fluorescence was pseudocolored in green, DAPI in blue. Bar: 1  $\mu$ m.

Figure S1

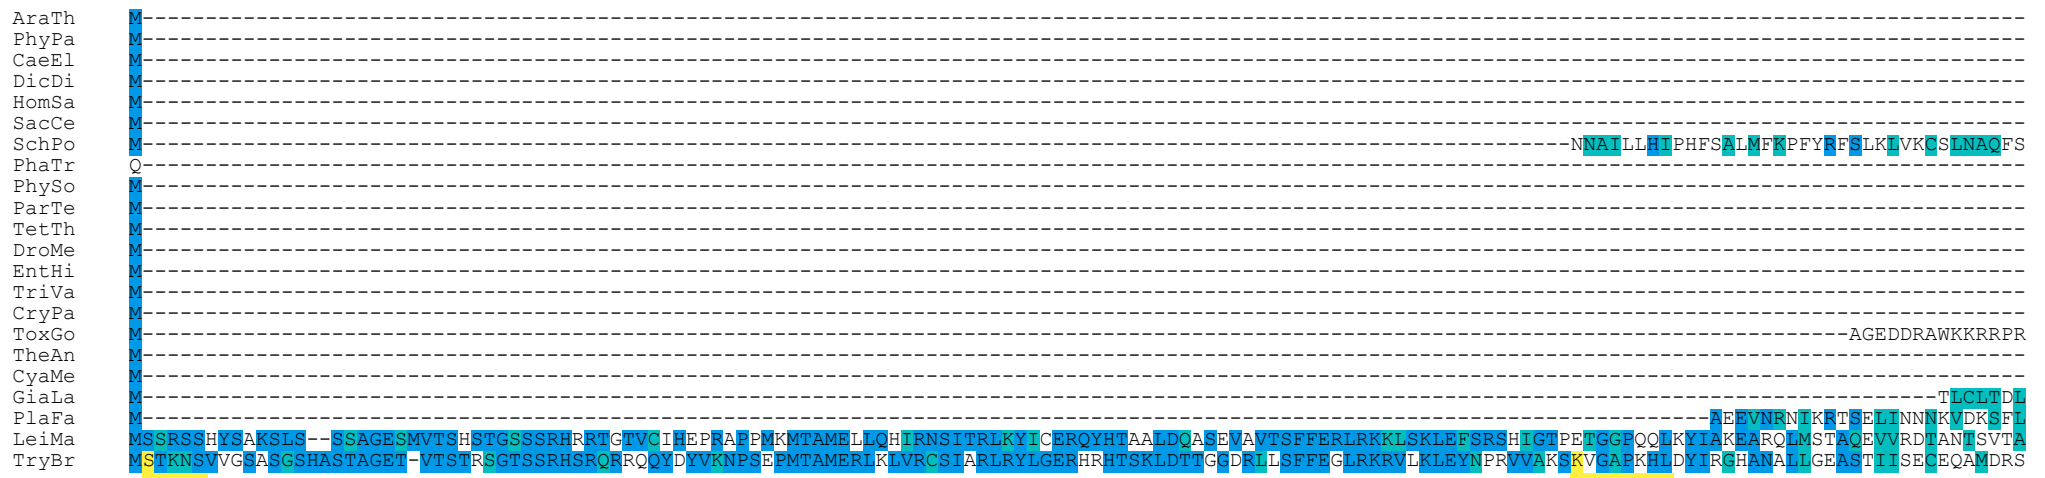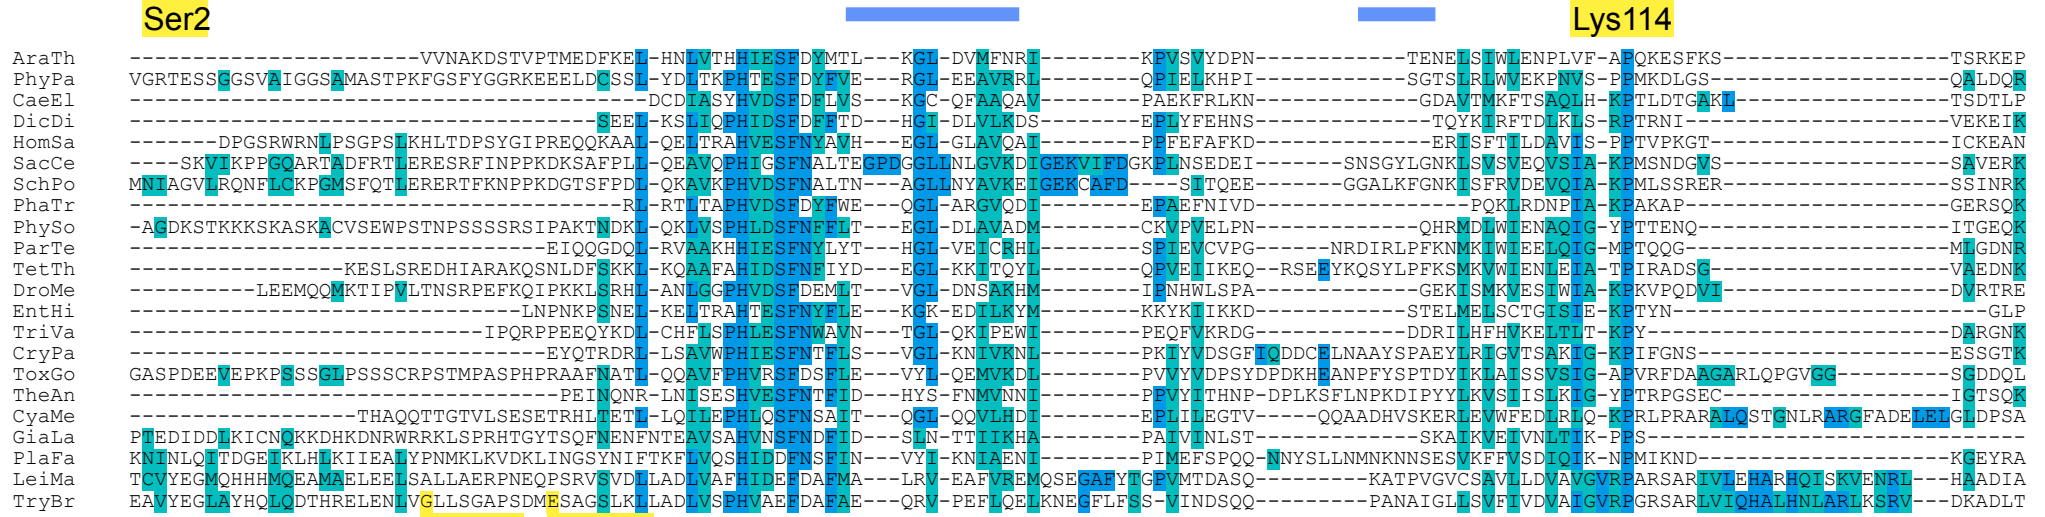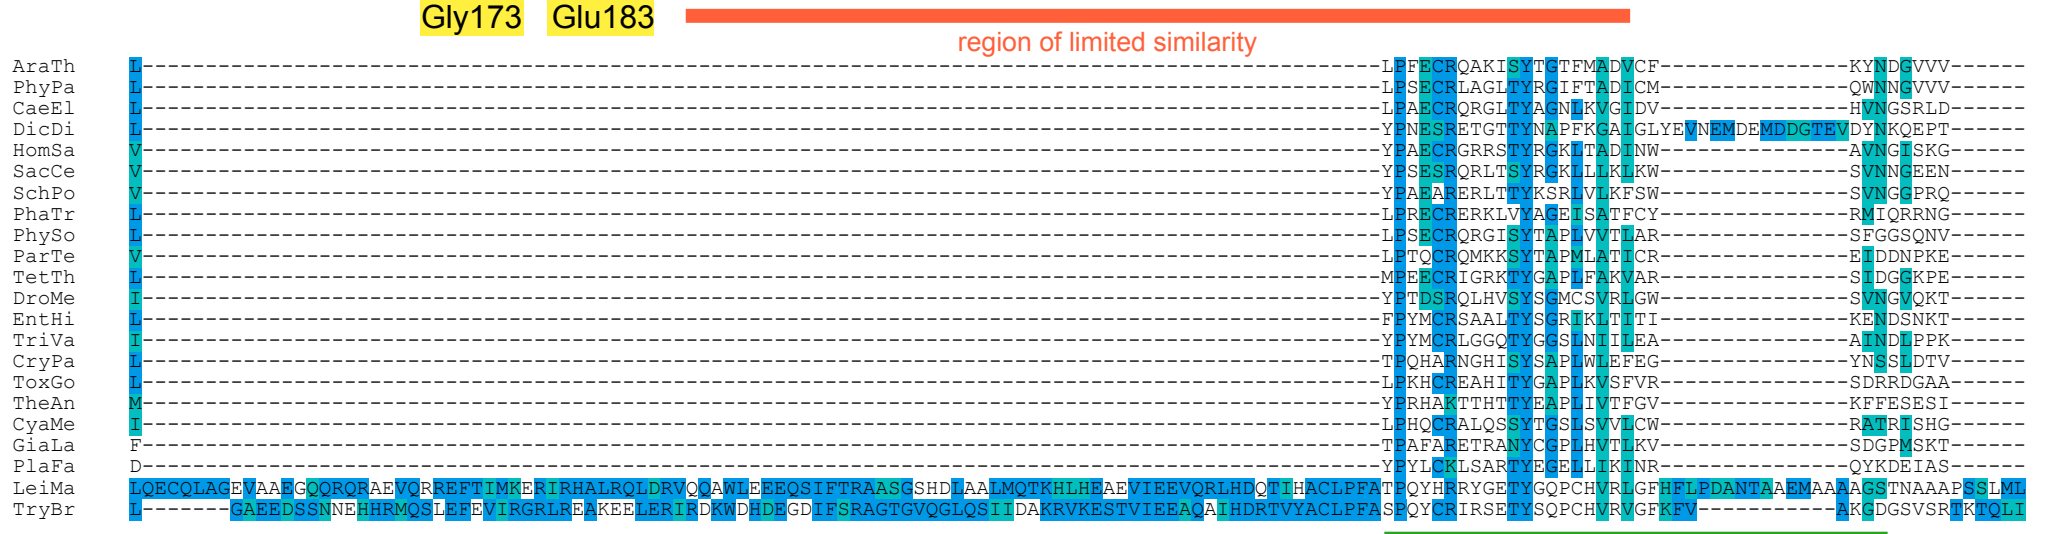

RPA2 domain A

# Figure S2

*L. major* MSSRS--YSAKLSSSAGESMVTSHSTGSSSRHRTGTVCIHFRAPPKMTAMELLOHIRNSITRLKYICERQYHTAALDQASEAVTSFFERLRKKLSKLEFSRSH  
*L. infantum* MSSRS--YSAKLSSSAGESMVTSHSTGSSSRHRTGTAGIHFRAPPKMTAMERLQHIRNSITRLKYICERQYHTAALDQASEAVTSFFERLRKKLSKLEFSRSH  
*L. braziliensis* MSSRS--YSAKLSSSAGESMVTSHSTGSSSRHRTGTGIIHFRAPPKMTAAERLQHVNSITRLKYICERQHHTAALDQAAEASVMTFFERLRKKLPRIEFSRSH  
*T. cruzi* MSKNP--RSSHNSVGENYTSRHS--SVSSRRRRC--EKRRVLLPPANMTFFERLQLLRNALTROMYIGERHLSAMLDTAGGKVLFFEKLRRLPKLEYNPRK  
*T. vivax* MSVKTS--TSSSHSSSAGENYTSRHS--CHSSRCRE--QHHGFSMLPPIKMTAERLKHVNSITRLRSTIGERHSHQELDTAGGNELEFFDGLRRLPKLEYNPRR  
*T. brucei* MSTKNSVVGASGSHSTAGETVTSRHS--GTSSRHSRCRRQYDYVKNPSEPMTAMERLKLVRCSLARLRYLGERHRSKLDTTGGDRLLSFFEGRLRRLPKLEYNPRV  
*T. congolense* MEFVGEC--SLGSRSTCEINTSGRS--GSSRRKPLARRRRERVAPPEPKAMEKQLVRCSLTRRLRYLCERYRHMTLDTDNELQNFERSLSDHMTLHHPRA

*L. major* IGTPEGGPQOLKYLANEARQLMSTACEVVRDTANISVTA TCVEGMOHHMQEAMAELEELSALLAERPNEQPSRVSDLLADLVAFHIDEFDAPMALRVEAFVREMOS  
*L. infantum* IGTPEGGPQOLKYMANESRQLMSTACEVVRDTANISATATCVEGMOHHMQEAMAELEELSALLAERPNEQPSRVNADLLADLVAFHIDEFDAPMSLRVEAFAREMOS  
*L. braziliensis* IGTPEGGPRLQYILKEVROLMSTACELVDRDTANASATATVEGMOHHMQEAMAELEELSVLLAEHPNEQPSRVNIDLLADLVAFHIDEFDAPMALRVEAFVREMOS  
*T. cruzi* LGCPIGNGPKLOXYIREQTLIQDAANVVLMSCEAOKKCKDAVYEGLSYHYLQEVLRLEETIQHLLSHAPSEMPSPRVNTDOLLADLVSCFINEFDAPAEORVEAFVSEAKN  
*T. vivax* LGAPEGGPKHLOXYITRAQNERLSEANASTLPTCEQLDLSAVAVYQCLAYHLOEAREHEHLVYLVSNPPSRMDSLENTLISDLVTPHITTEPDAPAEORVDAFIREMKN  
*T. brucei* VAKSKVGA PKHLDYIRGHANALLGEASTITISECEQAMDRSEAVYEGLAYHLODTHRELENLVLLSGAPSDMESAGSKLLADLVSPHVAEFDAPAEORVPEFIQELKN  
*T. congolense* ICKSIGKPRHLLHMNLVKSLLNEATTLIPRCEFRMRSLSESTYKGLGYHLODQVCRELEGLQVLLSRAPSEMSTFRSTELLFNLVSIHVDDFISLSNQRLLQSFVREVCN

*L. major* EGAFTYGPVMTDASQKATPVGVCSAVLLDVAVGVRPARSARIVLEHARHQISKVENRHAADIALQECQLAGEVAEAGQORQRAEVORREFTIMKERTRHAIQLDRVQQ  
*L. infantum* EGAFTYGPVMTDASQKATPVGVCSAVLLDVAVGVRPARSARIVLEHARHQINKVENRHAADIALQECQAGEVAADGQORQRAEVORREFTIMKERTRHAIQLDRVQQ  
*L. braziliensis* EGAFTYGPVMTDASQKATRIGVCSAVLLDVAVGVRPGHSAIVLDHARHNKIKVENRHAADIALQDQCPVGEAAVQQRQAEVORREFTIMKERTRHAIQLDRVQQ  
*T. cruzi* ECTLFTAVVNELSQRAPSTGLVSI FVLDVAIGVRPGRCARIVIEHAQHNLTKLENRLHTAGSVLS-----AMT-SEKDLFTTORRELAILKDRVAGSIAEILRLKK  
*T. vivax* EGVAYTAVVNEIHRPPKPVGLVSVFLLDVAIGVRPGCAKIVIEHAKHNLTKIENRIGLASQSLN-----VKESERNLQORREYTLIQERLTDVNLDDKVKI  
*T. brucei* EGFLEFSVINDSQPFANAIGLLSVFIVDVAIGVRPGRSARLVIQHALHNLARLKS RVDKADITIG-----REESSNNEHHRMCSLEHEVIRGRLREKKEELERIRD  
*T. congolense* EGALPHYAVKN-TEQSEVAVGLVSVFPEVAIGVFPKGSARIVIQAHHNLHKIESRLKALQVLE-----GTS-VPDDHAWRORRELKLLQDRVKESIGDLDRIKS

*L. major* AWLEEEQSIFTRAASGSHDLAALMOTKHLHEAEVIEEVRRLHDQTIHACLPPFATPQVHRRYGETYGPCHVRLGFHFLPDANTAAMAAAGS TNAAAFSSLMIRTLSTE  
*L. infantum* AWLEEEQSIFTRAASGSHDLAALMOTKHLREAEVIEEVRRLHDQTIHACLPPFATPQVHRRYGETYGPCHVRLGFHFLPDANTAAMAAAGS ANAAAFSSLMIRTLSTE  
*L. braziliensis* TWREEEQSIFTRA TSGSHDLVLMOTKHLREAEVIEEVLHDQTIHACLPPFATPQVHRRYGETYGPCHIRLGFHFLPDNTAAELAAASGTSAAAFSSLIIRTLSSSE  
*T. cruzi* KWEEEEELTTERAASGQHVLLSLVMKRLKEAEIIEEAQLIHDRAMHSCILHSAPOYRRYS ETYAQPVYQIGKFKL-----CGEQVESQPKSMITLYALVPE  
*T. vivax* EMTAEEEDTFRALSNKQSI PSLIRMKRLKESVVIHKVQNIHDCAVYSCLPFATPQVSRHSETYGPCHVRLGLKES-----TEERVDCQORSRTLYLMP  
*T. brucei* KKDHDGDFISRACTVQGGQSIIIDAKRVKESVIEEAQAIHDRVYACLPFASPOVCHIRSETYSQPCHVRVGFKEV-----AKGDCSRSRTKTLTYLNLMP  
*T. congolense* RWTADDEDLFRKASCKEQSLLILMETQARELAVVEEVQLHDHTVRACILFASPOVCRWHGETYSQPCHVRVIGYKFI-----GDDCGSQRVYQKISVLMPE

RPA2 domain A

Figure S3

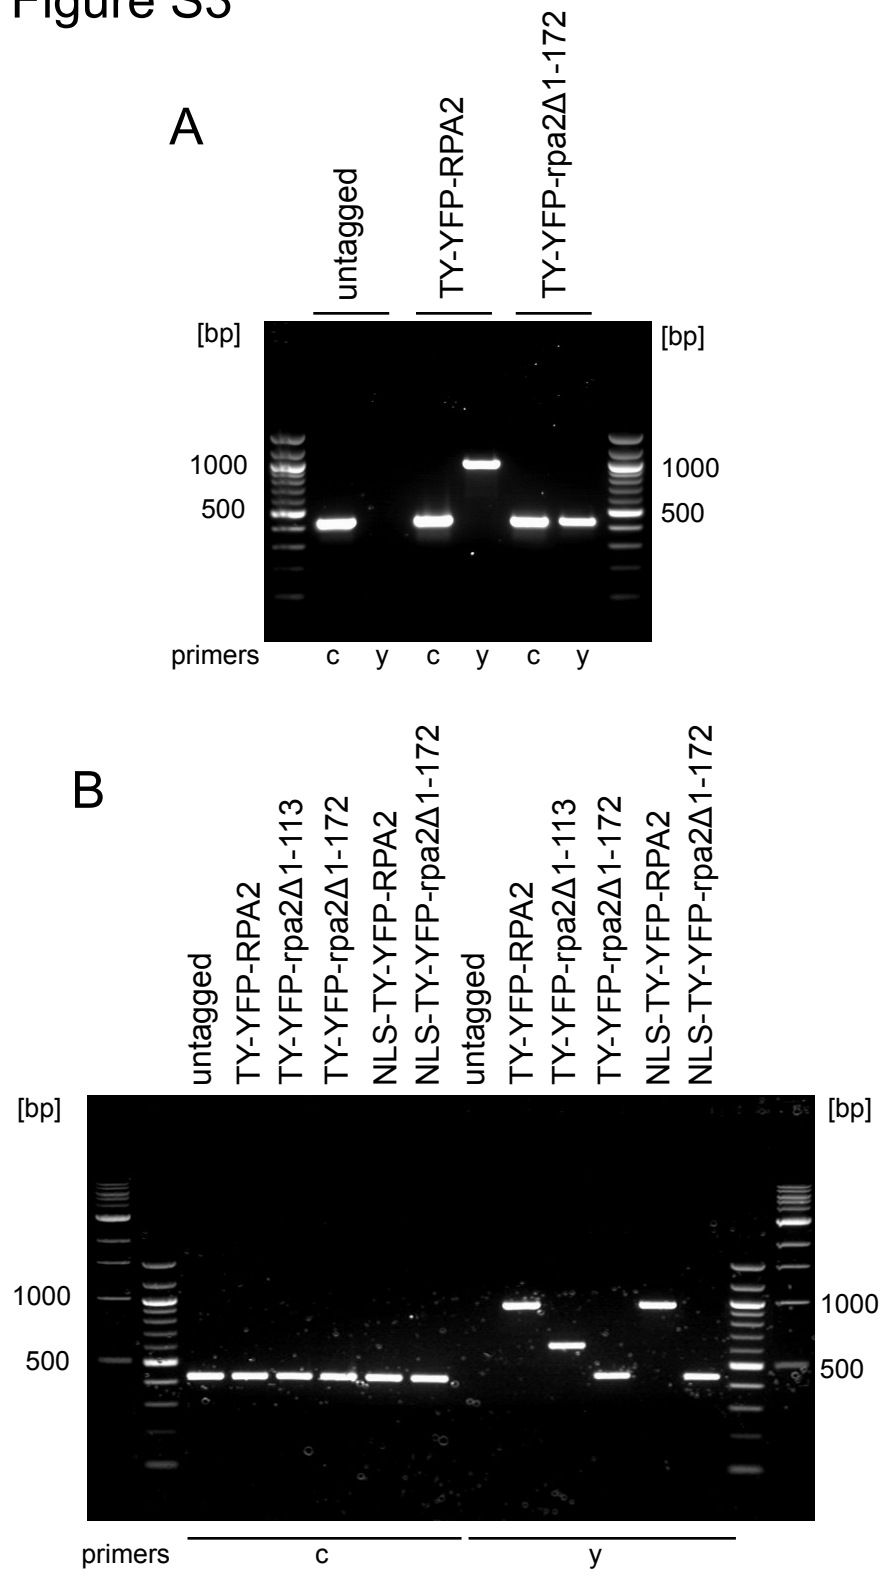

Figure S4

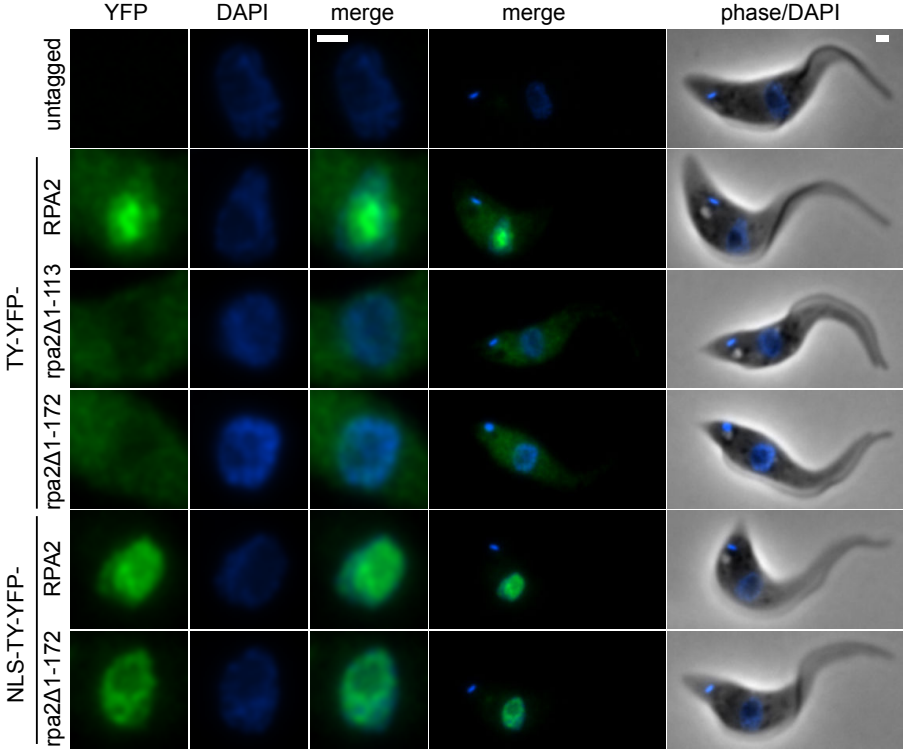

Figure S5

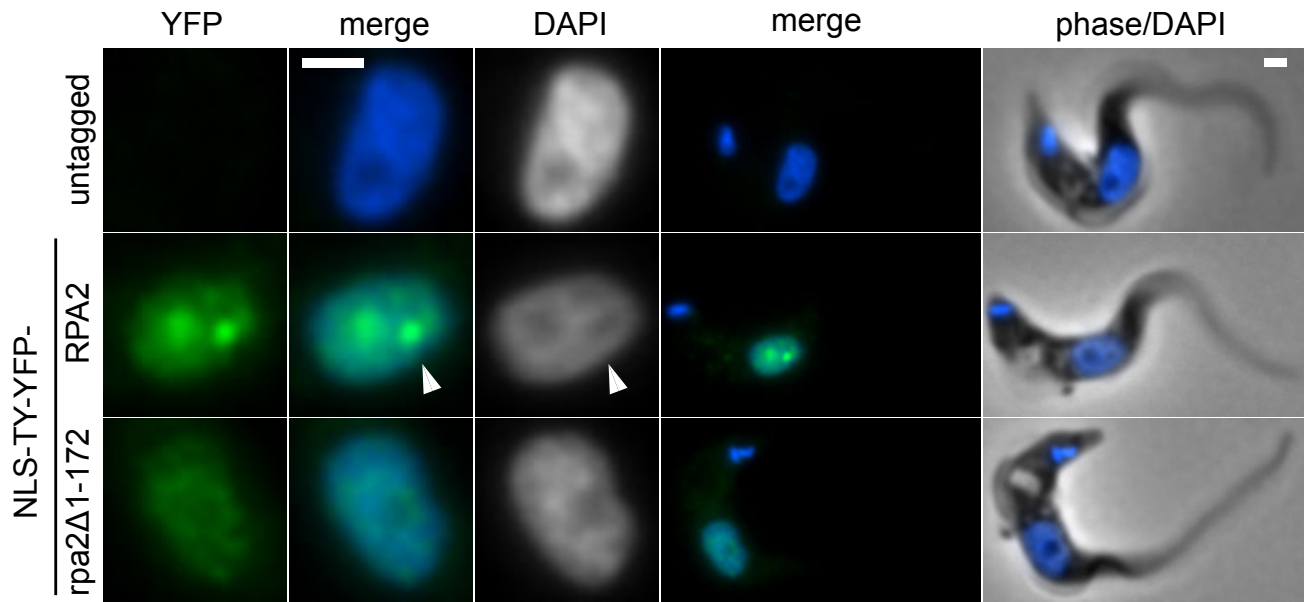

**Table S1.** NCBI and genome references of RPA2 protein data set.

| <b>Organism</b>                  | <b>Abbreviation</b> | <b>Protein ID (RPA2)</b> |
|----------------------------------|---------------------|--------------------------|
| <i>Arabidopsis thaliana</i>      | AraTh               | NP_564341.2              |
| <i>Caenorhabditis elegans</i>    | CaeEl               | NP_492476.1              |
| <i>Cryptosporidium parvum</i>    | CryPa               | XP_628100.1              |
| <i>Cyanidioschyzon merolae</i>   | CyaMe               | CMS114C                  |
| <i>Dictyostelium discoideum</i>  | DicDi               | XP_629008.1              |
| <i>Drosophila melanogaster</i>   | DroMe               | NP_476708.1              |
| <i>Entamoeba histolytica</i>     | EntHi               | XP_652347.1              |
| <i>Giardia lamblia</i>           | GiaLa               | XP_001708931.1           |
| <i>Homo sapiens</i>              | HomSa               | NP_061887.2              |
| <i>Leishmania major</i>          | LeiMa               | XP_001683815.1           |
| <i>Monosiga brevicollis</i>      | MonBr               | XP_001750532.1           |
| <i>Naegleria gruberi</i>         | NaeGr               | 55898                    |
| <i>Paramecium tetraurelia</i>    | ParTe               | XP_001456821.1           |
| <i>Paramecium tetraurelia</i>    | ParTe               | XP_001430889.1           |
| <i>Phaeodactylum tricornutum</i> | PhaTr               | XP_002177384.1           |
| <i>Physcomitrella patens</i>     | PhyPa               | XP_001773955.1           |
| <i>Phytophthora ramorum</i>      | PhyRa               | 42703                    |
| <i>Phytophthora sojae</i>        | PhySo               | 108266                   |
| <i>Plasmodium falciparum</i>     | PlaFa               | XP_001348029.1           |
| <i>Saccharomyces cerevisiae</i>  | SacCe               | NP_015335.1              |
| <i>Schizosaccharomyces pombe</i> | SchPo               | NP_595819.1              |
| <i>Takifugu rubripes</i>         | TakFu               | SINFRUP00000142122       |
| <i>Tetrahymena thermophila</i>   | TetTh               | XP_001030557.1           |
| <i>Thalassiosira pseudonana</i>  | ThaPs               | XP_002293007.1           |
| <i>Theileria annulata</i>        | TheAn               | XP_953002.1              |
| <i>Toxoplasma gondii</i>         | ToxGo               | EEB04043.1               |
| <i>Trichomonas vaginalis</i>     | TriVa               | XP_001318134.1           |
| <i>Trypanosoma cruzi</i>         | TryCr               | Tc00.1047053506925.40    |
| <i>Trypanosoma brucei</i>        | TryBr               | XP_828155.1              |



**Table S2.** Oligonucleotides used in this study

| oligo name                | sequence                                |
|---------------------------|-----------------------------------------|
| <b>SiMP1</b>              |                                         |
| Ups_F                     | ctctogagctCTTTATCCGCCGAAAATTGGT         |
| Ups_R                     | acatagatctGGGGAGCGGTGCCCTGTTT           |
| Downs_F                   | cacatgatgcGTTCTCGTGATCGCTGCAC           |
| Downs_R                   | acgagctcTCAGGTTCAGGTTCAAGGGTC           |
| EP1-prom_F                | ttaaagcttGTTGTCAATGGGGTTAAGCG           |
| EP1-prom_R                | ttggatccGTGCAGCGCATCACGAGAAC            |
| Tet-Neo_F                 | CCGGTAATACGTCTCACTATA                   |
| Tet-Neo_R                 | ACGGGGCTACAATTAATACAT                   |
| linker_F                  | CAGATCTAAGCTTGTAAACCTCGA                |
| linker_R                  | GATCTCGAGGTTAACCAAGCTTAGATCTGCATG       |
| <b>endogenous tagging</b> |                                         |
| RPA2Ser2_F                | CCttaga TCAACAAAAGAAATTCGGTTGT          |
| RPA2Ser2_R                | AActcgagAA TAA TGGTCTGATGCCTCTC         |
| RPA2Lys114_F              | AAtctagaAAAAGTCGGTGCACCAAAG             |
| RPA2Lys114_R              | AActcgagGGCAGGTTGTTGAGAATCAT            |
| RPA2Gly173_F              | TTtctagaGGGTTGCTATCTGGTGC               |
| RPA2Gly173_R              | GGctcgagGATCGGC TTTGTCAACAC             |
| RPA2Glu183_F              | GatctagaGAGAGCGCTGGATCTTTG              |
| RPA2Glu183_R              | GActcgagTCTTAAACGGCCACCGAAT             |
| RPA25UTR_F                | TTctcgagCCCAGTTGTGAGGTTGTTG             |
| RPA25UTR_R                | TTggatccTTTGCACGC TTCACGC               |
| <b>NLS cloning</b>        |                                         |
| LaNLSTYoligo_F            | agcttATGCGCGGTCAACAAGCGCTCCCGCTCCCGCGA  |
| LaNLSTYoligo_R            | ctagfGTCAAGTGGATCTTGGTTAGTAGTGGACCTCCTC |
| <b>ectopic expression</b> |                                         |
| XbaRPA2Nt_F               | ATtctagaTCAACAAAAGAAATTCGGTTGTA         |
| BamTAARPA2Nt_R            | ATggatccTTATACTAAGTTCTCCAACCTCGC        |
| <b>genomic sequencing</b> |                                         |
| gS2_F                     | CTGCTGGAGTTCGTGAC                       |
| gG173_R                   | CCTGTGATGTTCCGTTATTGCTA                 |

**Table S3.** GeneDB references for additional trypanosome RPA2 proteins.

| <b>Organism</b>                | <b>Abbreviation</b> | <b>Protein ID (RPA2)</b> |
|--------------------------------|---------------------|--------------------------|
| <i>Leishmania infantum</i>     | LeIn                | LinJ25_V3.0630           |
| <i>Leishmania braziliensis</i> | LeiBr               | LbrM25_V2.2130*          |
| <i>Trypanosoma vivax</i>       | TryVi               | Tviv811a10.p1k_4         |
| <i>Trypanosoma congolense</i>  | TryCo               | congo1390g02.q1k_4       |

\*) We modified the start codon of this protein from the annotated to an in-frame start codon further upstream. This resulted in the full-length protein displayed in Fig. S1.

**Table S4.** Sources of predicted proteomes used in this study.

| Organism                         | Source                   | Version         | Web reference                        | Download filename                                |
|----------------------------------|--------------------------|-----------------|--------------------------------------|--------------------------------------------------|
| <i>Arabidopsis thaliana</i>      | TAIR                     | TAIR7           | www.arabidopsis.org/                 | TAIR7_pep_20070425                               |
| <i>Caenorhabditis elegans</i>    | WormBase                 | WS179           | www.sanger.ac.uk/Projects/C_elegans/ | wormpep170.tar.gz                                |
| <i>Chlamydomonas reinhardtii</i> | JGI                      | v3.0            | www.jgi.doe.gov/                     | proteins.Chlre3.fasta.gz                         |
| <i>Cryptosporidium parvum</i>    | CryptoDB                 | v3.4            | www.cryptodb.org/                    | CparvumAnnotatedProtein.fsa.zip                  |
| <i>Cyanidioschyzon merolae</i>   | C.merolae genome project | ?               | merolae.biol.s.u-tokyo.ac.jp/        | cds.fasta                                        |
| <i>Dictyostelium discoideum</i>  | dictyBase                | 05-20-2007      | dictybase.org/                       | dicty_predictions_protein.gz                     |
| <i>Drosophila melanogaster</i>   | ENSEMBL                  | BDGP4.3, 46.43b | www.ensembl.org/info/data/           | Drosophila_melanogaster.BDGP4.3.46.pep.all.fa.gz |
| <i>Entamoeba histolytica</i>     | geneDB                   | 17102005        | www.genedb.org/                      | GeneDB_Ehistolytica_Proteins_17102005            |
| <i>Giardia lamblia</i>           | GiardiaDB                | April 17, 2007  | www.mbl.edu/Giardia                  | orfs_aa.fas.gz                                   |
| <i>Homo sapiens</i>              | VEGA                     | Jun2006         | vega.sanger.ac.uk/                   | Homo_sapiens.VEGAJun.pep.tot.fa.gz               |
| <i>Leishmania major</i>          | geneDB                   | v5.2            | www.genedb.org/                      | LmjFwholegenome_20060901_V5.2.pep                |
| <i>Monosiga brevicollis</i>      | JGI                      | v1.0            | www.jgi.doe.gov/                     | Monbr1_best_proteins.fasta.gz                    |
| <i>Naegleria gruberi</i>         | JGI                      | v1.0            | www.jgi.doe.gov/                     | Naegr1_best_proteins.fasta.gz                    |
| <i>Paramecium tetraurelia</i>    | ParameciumDB             | v1.11           | paramecium.cgm.cnrs-gif.fr/          | Ptetraurelia_peptides_v1.04.fasta                |
| <i>Phaeodactylum tricomutum</i>  | JGI                      | v2.0            | www.jgi.doe.gov/                     | Phatr2_geneModels_FilteredModels_aa.fasta.gz     |
| <i>Physcomitrella patens</i>     | JGI                      | v1.1            | www.jgi.doe.gov/                     | proteins.Phypta1_FilteredModels3.fasta.gz        |
| <i>Phytophthora sojae</i>        | JGI                      | v1.1            | www.jgi.doe.gov/                     | proteins.FM_Physo1_1.fasta.gz                    |
| <i>Phytophthora ramorum</i>      | JGI                      | v1.1            | www.jgi.doe.gov/                     | proteins.FM_Phyra1_1.fasta.gz                    |
| <i>Plasmodium falciparum</i>     | PlasmoDB                 | v5.3            | www.plasmodb.org/                    | PfalciparumAnnotatedProteins_plasmoDB-5.3.fasta  |
| <i>Saccharomyces cerevisiae</i>  | ENSEMBL                  | SGD1.01.46      | www.ensembl.org/info/data/           | Saccharomyces_cerevisiae.SGD1.01.46.pep.all.fa   |
| <i>Schizosaccharomyces pombe</i> | Sanger                   | v19?            | www.sanger.ac.uk/Projects/S_pombe    | pompep                                           |
| <i>Takifugu rubripes</i>         | ENSEMBL                  | Assembly4, 46   | www.ensembl.org/info/data/           | Takifugu_rubripes.FUGU4.46.pep.all.fa.gz         |
| <i>Tetrahymena thermophila</i>   | TIGR                     | 10/24/2006      | www.tigr.org/tdb/e2k1/ta1/           | TTA1.pep                                         |
| <i>Thalassiosira pseudonana</i>  | JGI                      | v3.0            | www.jgi.doe.gov/                     | Thaps3_geneModels_FilteredModels_aa.fasta.gz     |
| <i>Theileria annulata</i>        | GeneDB                   | v4              | www.genedb.org/                      | TANN.GeneDB.pep                                  |
| <i>Toxoplasma gondii</i>         | ToxoDB                   | v4.1            | www.toxodb.org/                      | TgondiiAnnotatedProteins_toxoDb-4.1.fasta        |
| <i>Trichomonas vaginalis</i>     | TIGR                     | 20050331        | www.tigr.org/tdb/e2k1/tvg/           | 02152007_all_model_aa.fasta                      |
| <i>Trypanosoma brucei</i>        | geneDB                   | v4              | www.genedb.org/                      | Tb927_Proteins_May06_v4.fas.gz                   |
| <i>Trypanosoma cruzi</i>         | T cruziDB                | v5.0            | www.tcruzidb.org                     | TcruziAnnotatedProtein.fas                       |
